# Supplementary material for: First Descriptive Analysis of the Faecal Microbiota of Wild and Anthropized Barbary Macaques (Macaca sylvanus) in the Region of Bejaia, Northeast Algeria
Source: MDPI journal article supplement (doi:10.3390/biology11020187), 2022-01-25
Supplement: s1 [file s1]

# First Descriptive Analysis of the Faecal Microbiota of Wild and Anthropized Barbary Macaques (*Macaca sylvanus*) in the Region of Bejaia, Northeast Algeria

Mourad Boumenir <sup>1,2</sup>, Jean-Luc Hornick <sup>1,2</sup>, Bernard Taminiau <sup>2,3</sup>, Georges Daube <sup>2,3</sup>,  
Fany Brotcorne <sup>4</sup>, Mokrane Iguer-Ouada <sup>5</sup> and Nassim Moula <sup>2,6,7,\*</sup>

<sup>1</sup> Department of Veterinary Management of Animal Resources, Faculty of Veterinary Medicine, University of Liege, 4000 Liege, Belgium; Mourad.Boumenir@doct.uliege.be (M.B.); jlhornick@uliege.be (J.-L.H.)

<sup>2</sup> Fundamental and Applied Research for Animal and Health (FARAH), University of Liege, 4000 Liege, Belgium; bernard.taminiau@uliege.be (B.T.); Georges.Daube@uliege.be (G.D.)

<sup>3</sup> Food Microbiology, Department of Food Sciences, Faculty of Veterinary Medicine, University of Liege, 4000 Liege, Belgium

<sup>4</sup> Behaviour Biology Lab, Research Unit SPHERES, Department of Biology, Ecology, and Evolution, Faculty of Sciences, University of Liège, 4000 Liege, Belgium; fbrotcorne@uliege.be

<sup>5</sup> Associated Laboratory in Marine Ecosystems and Aquaculture, Department of Biological Sciences of the Environment, Faculty of Nature and Life Sciences, University of Bejaia, 06000 Bejaia, Algeria; imokrane@gmail.com

<sup>6</sup> GIGA Animal Facilities, Liege University, 4000 Liege, Belgium

<sup>7</sup> Department of Animal Production, Faculty of Veterinary Medicine, Liege University, 4000 Liege, Belgium

\* Correspondence: Nassim.Moula@uliege.be; Tel.: +32-4-366-4124

**Table S1: A measure of sampling effort for each sample using Good's coverage estimator (rarefied table at 10,000 sequences per sample).**

| Samples<br>label | Good's coverage (%) |
|------------------|---------------------|
| TPG 01           | 99.79%              |
| TPG 02           | 99.70%              |
| TPG 03           | 99.71%              |
| TPG 04           | 99.82%              |
| TPG 05           | 99.82%              |
| TPG 06           | 99.78%              |
| WFG 01           | 99.83%              |
| WFG 02           | 99.85%              |
| WFG 03           | 99.69%              |
| WFG 04           | 99.75%              |
| WFG 05           | 99.74%              |
| WFG 06           | 99.77%              |



Table S3: The average proportions of Barbary macaque fecal microbiota at phylum level between the TP and WF groups.

| Phylum             | TPG                     |             | WFG                     |             |
|--------------------|-------------------------|-------------|-------------------------|-------------|
|                    | Average proportions (%) | S.D (%)     | Average proportions (%) | S.D (%)     |
| Firmicutes         | 94.84135765             | 71.79498625 | 93.2697723              | 69.08536031 |
| Bacteroidetes      | <b>0.826921863</b>      | 0.986793702 | <b>4.297393312</b>      | 5.468066568 |
| Tenericutes        | 0.318547131             | 0.203765701 | 0.52564215              | 0.724610482 |
| Actinobacteria     | 0.216688215             | 0.250110694 | 0.428547018             | 0.535452457 |
| Proteobacteria     | 0.380860213             | 0.466759419 | 0.297148029             | 0.299609051 |
| Bacteria_ph        | 0.101327325             | 0.09848449  | 0.261430321             | 0.308472218 |
| Cyanobacteria      | 0.057117246             | 0.042546163 | 0.108038838             | 0.05544829  |
| Verrucomicrobia    | <b>2.088066581</b>      | 2.159629286 | <b>0.07798574</b>       | 0.104098689 |
| Epsilonbacteraeota | 0.028560695             | 0.031495675 | 0.001783294             | 0.003987567 |
| Patescibacteria    | 0.010080253             | 0.011656221 | 0.001685204             | 0.00376823  |
| Spirochaetes       | 0.663707193             | 0.934527339 | 0                       | 0           |
| WPS-2              | 0.060361654             | 0.081889499 | 0                       | 0           |

**Table S4: The average proportions of Barbary macaque fecal microbiota at genus level between the TP and WF groups.**

| Genus                                  | TPG                |            | WFG                |            | p-values   |            |
|----------------------------------------|--------------------|------------|--------------------|------------|------------|------------|
|                                        | Average            | S.D        | Average            | S.D        | p-values   | corrected  |
|                                        | proportions<br>(%) | (%)        | proportions<br>(%) | (%)        |            |            |
| Ruminococcaceae_UCG-002                | 8.22096752         | 7.0761071  | 28.0225812         | 16.9302915 | 0.04813761 | 0.67713577 |
| Ruminococcaceae_ge                     | 4.077813668        | 2.89077892 | 20.6580866         | 15.1114187 | 0.05747591 | 0.71337743 |
| Ruminococcus_2                         | 21.09481273        | 10.4449885 | 0.62848252         | 0.61090222 | 0.00708275 | 0.37361491 |
| Ruminococcaceae_UCG-005                | 4.116826587        | 2.38856974 | 12.229966          | 1.54294056 | 0.00016015 | 0.03379235 |
| Faecalibacterium                       | 15.90466835        | 12.96292   | 0.53312671         | 0.39644314 | 0.04532514 | 0.73566188 |
| Christensenellaceae_R-7_group          | 6.630294098        | 2.74685809 | 1.0837972          | 0.36402852 | 0.00602445 | 0.42371994 |
| Subdoligranulum                        | 6.460949457        | 4.68995541 | 1.38162776         | 1.34721996 | 0.06015603 | 0.70516236 |
| Ruminococcaceae_UCG-010                | 0.875854029        | 1.38892077 | 7.31382            | 5.14795669 | 0.03729085 | 0.78683684 |
| Dorea                                  | 4.72331511         | 2.3782348  | 0.26436299         | 0.32859089 | 0.00819821 | 0.34596426 |
| Lachnospiraceae_ge                     | 3.152472345        | 1.82190392 | 2.67551564         | 1.6315939  | 0.67215572 | 0.72359621 |
| Blautia                                | 2.796397509        | 1.66430774 | 0.82936693         | 1.26619486 | 0.06367894 | 0.70717136 |
| Ruminococcaceae_UCG-013                | 0.453843344        | 0.2030036  | 3.06293237         | 2.6735486  | 0.080913   | 0.74228883 |
| Ruminococcaceae_NK4A214_group          | 0.352747653        | 0.1322385  | 2.36610889         | 1.50649851 | 0.03032927 | 0.79993457 |
| Erysipelotrichaceae_UCG-003            | 3.285285733        | 3.78399277 | 0.46114911         | 0.37676798 | 0.15653782 | 0.76812744 |
| Prevotella_9                           | 0.104123456        | 0.06725261 | 2.11391167         | 2.19176007 | 0.09560356 | 0.80689402 |
| Clostridiales_Family_XIII_AD3011_group | 1.134299192        | 0.77431504 | 0.67798938         | 0.36542613 | 0.27157572 | 0.68217235 |
| Ruminococcaceae_UCG-014                | 1.677586276        | 1.43836958 | 0.8706717          | 1.09163328 | 0.34290509 | 0.75367682 |
| Akkermansia                            | 2.088066581        | 2.15962929 | 0.07798574         | 0.10409869 | 0.091942   | 0.80832339 |
| Clostridiales_Family_XIII_ge           | 1.286141769        | 1.72363984 | 1.0472682          | 1.50005778 | 0.81997501 | 0.86942074 |
| Dialister                              | 0.402175796        | 0.54161521 | 0.78299369         | 0.92463679 | 0.44955517 | 0.54830139 |
| Lachnospiraceae_NK4A136_group          | 0.444445032        | 0.31284128 | 0.04110999         | 0.03647437 | 0.0341909  | 0.80158658 |
| Marvinbryantia                         | 0.613767399        | 0.69400072 | 0.02128221         | 0.03437064 | 0.11459658 | 0.83378892 |

|                                  |             |            |            |            |            |            |
|----------------------------------|-------------|------------|------------|------------|------------|------------|
| Clostridiales_vadinBB60_group_ge | 0.01847603  | 0.02422983 | 0.40004541 | 0.36596554 | 0.06706978 | 0.67389156 |
| Mollicutes_RF39_ge               | 0.308450654 | 0.18946336 | 0.46769848 | 0.65017413 | 0.61836646 | 0.68311687 |
| Rikenellaceae_ge                 | 0.041919881 | 0.05079602 | 0.50624908 | 0.59609794 | 0.14233517 | 0.77006974 |
| Coprococcus_3                    | 0.482516245 | 0.42086207 | 0.12965872 | 0.17677867 | 0.12937606 | 0.80289262 |
| Bacteroidales_ge                 | 0.082304824 | 0.12243411 | 0.42005867 | 0.41903662 | 0.13564606 | 0.81775195 |
| Muribaculaceae_ge                | 0.391965603 | 0.5209604  | 0.12604965 | 0.07475135 | 0.30791563 | 0.70619781 |
| Solobacterium                    | 0.228419124 | 0.13393793 | 0.01858528 | 0.01682345 | 0.01686735 | 0.50843025 |
| Candidatus_Stoquefichus          | 0.193312001 | 0.18772405 | 0.17741607 | 0.29684759 | 0.9217517  | 0.95807689 |
| Ruminococcus_1                   | 0.273517981 | 0.32043287 | 0.42919689 | 0.82389918 | 0.70637924 | 0.75657878 |
| Bacteria_ge                      | 0.101327325 | 0.09848449 | 0.26143032 | 0.30847222 | 0.3111969  | 0.70604888 |
| Ruminiclostridium_6              | 0.065536105 | 0.08996252 | 0.18852079 | 0.11845272 | 0.09636694 | 0.7820548  |
| Gastranaerophilales_ge           | 0.057117246 | 0.04254616 | 0.10803884 | 0.05544829 | 0.13637332 | 0.79929921 |
| Coprococcus_1                    | 0.365552337 | 0.4072913  | 0.05444758 | 0.05833399 | 0.14936475 | 0.78789906 |
| Rhodospirillales_ge              | 0.01011003  | 0.01166408 | 0.15487377 | 0.16165206 | 0.10170855 | 0.79483345 |
| Coriobacteriales_ge              | 0.065567743 | 0.09943914 | 0.37138423 | 0.44717835 | 0.19056543 | 0.62827039 |
| Lactobacillus                    | 0.201135341 | 0.23605452 | 0.02201995 | 0.03574008 | 0.15170099 | 0.78070509 |
| Christensenellaceae_ge           | 0.077341493 | 0.02445028 | 0.04542072 | 0.04483099 | 0.20097713 | 0.63292799 |
| Ruminiclostridium_5              | 0.099197271 | 0.03748149 | 0.01552093 | 0.01470373 | 0.00284992 | 0.30066673 |
| Fusicatenibacter                 | 0.179433876 | 0.20118691 | 0.06454182 | 0.0982924  | 0.2876482  | 0.7057415  |
| Rikenellaceae_RC9_gut_group      | 0.067399539 | 0.05795919 | 0.5864638  | 1.19579124 | 0.37663267 | 0.47873189 |
| Prevotellaceae_ge                | 0.035276514 | 0.02160297 | 0.42177236 | 0.81455924 | 0.33732598 | 0.74921875 |
| Escherichia-Shigella             | 0.099144736 | 0.07468659 | 0.0072193  | 0.00827121 | 0.03997709 | 0.76683335 |
| Clostridiales_ge                 | 0.026850073 | 0.02439611 | 0.08617842 | 0.06679341 | 0.1089437  | 0.82096861 |
| Holdemanella                     | 0.132076582 | 0.21142416 | 0.0424996  | 0.03666657 | 0.39112846 | 0.49418027 |
| Ruminococcaceae_UCG-003          | 0.088985924 | 0.09277447 | 0.03313923 | 0.02828822 | 0.24594366 | 0.64867639 |
| Ruminococcaceae_UCG-009          | 0.003352276 | 0.00474084 | 0.16481511 | 0.23161045 | 0.17980416 | 0.61191415 |
| Agathobacter                     | 0.001677571 | 0.00375116 | 1.21860526 | 2.39617236 | 0.30760256 | 0.71323232 |
| Phascolarctobacterium            | 3.521397617 | 7.70806465 | 0.0018754  | 0.00419352 | 0.35409001 | 0.77023702 |

|                              |             |            |            |            |            |            |
|------------------------------|-------------|------------|------------|------------|------------|------------|
| Alloscardovia                | 0.060462834 | 0.03427715 | 0          | 0          | 0.01091291 | 0.38377073 |
| Burkholderiaceae_ge          | 0           | 0          | 0.05661436 | 0.05418336 | 0.06667877 | 0.70346103 |
| Ruminiclostridium_9          | 0.036893871 | 0.02823094 | 0.04993038 | 0.0573658  | 0.6617152  | 0.71600978 |
| Coprococcus_2                | 0.224613721 | 0.34836854 | 0.01384807 | 0.01466189 | 0.23422572 | 0.65028457 |
| Succinivibrio                | 0.224620318 | 0.31419098 | 0.03770354 | 0.02653142 | 0.24156125 | 0.64518259 |
| Clostridium_sensu_stricto_1  | 0.005026138 | 0.00767579 | 0.10655054 | 0.13534949 | 0.15449892 | 0.77617314 |
| Lachnospiraceae_ND3007_group | 0.003351432 | 0.00473964 | 0.09042096 | 0.12254811 | 0.17308417 | 0.77703746 |
| Streptococcus                | 0.038785695 | 0.03016069 | 0.01640609 | 0.02403699 | 0.22498987 | 0.6329715  |
| Coriobacteriales_ge_ge       | 0.010113922 | 0.0082694  | 0.05716279 | 0.0882741  | 0.28782209 | 0.69805128 |
| Anaeroplasma                 | 0.010096477 | 0.01430234 | 0.05794367 | 0.07443636 | 0.21333647 | 0.60829724 |
| Anaerosporeobacter           | 0.04027653  | 0.03528731 | 0          | 0          | 0.05112766 | 0.67424604 |
| Alistipes                    | 0           | 0          | 0.05613423 | 0.06624919 | 0.11665951 | 0.79403731 |
| Lachnospiraceae_UCG-010      | 0.015092407 | 0.02582476 | 0.02434147 | 0.01640404 | 0.51707497 | 0.59946603 |
| Ruminococcaceae_UCG-008      | 0.025238426 | 0.02834956 | 1.64118005 | 3.65067231 | 0.36773963 | 0.47603105 |
| Butyricicoccus               | 0.015117267 | 0.01265576 | 0.0266144  | 0.02775872 | 0.42728353 | 0.52723289 |
| Sarcina                      | 0.045562246 | 0.05133229 | 0.00524581 | 0.00785762 | 0.1404553  | 0.8009748  |
| Anaerostipes                 | 0.067310564 | 0.08909995 | 0.01561262 | 0.02003068 | 0.2565107  | 0.66819455 |
| Lachnospira                  | 0.020193524 | 0.02665597 | 0.06379742 | 0.0775523  | 0.27822522 | 0.6906532  |
| Oxalobacter                  | 0.015107235 | 0.0112791  | 0.01357515 | 0.02157247 | 0.89176685 | 0.93149904 |
| Olsenella                    | 0.075493185 | 0.10307429 | 0          | 0          | 0.16240405 | 0.76149453 |
| Prevotellaceae_UCG-001       | 0.051959674 | 0.06264869 | 0          | 0          | 0.12282757 | 0.78535205 |
| Parabacteroides              | 0.013412304 | 0.01382776 | 0.01393962 | 0.01640156 | 0.9572807  | 0.98051567 |
| Ralstonia                    | 0           | 0          | 0.01521364 | 0.01263568 | 0.043181   | 0.75926598 |
| Anaerofustis                 | 0.03357577  | 0.04672558 | 0.01186915 | 0.01476386 | 0.36024355 | 0.76011388 |
| Campylobacter                | 0.028560695 | 0.03149567 | 0.00178329 | 0.00398757 | 0.11615555 | 0.81696072 |
| Defluviitaleaceae_UCG-011    | 0.03018414  | 0.03842536 | 0.11551469 | 0.25354372 | 0.48890708 | 0.58282143 |
| Roseburia                    | 0.103953267 | 0.13661921 | 0.00514742 | 0.00515142 | 0.16684645 | 0.76531739 |
| Lachnospiraceae_UCG-001      | 0.023495213 | 0.03320011 | 0.0471675  | 0.07606443 | 0.54436628 | 0.62424611 |

|                               |             |            |            |            |            |            |
|-------------------------------|-------------|------------|------------|------------|------------|------------|
| Intestinibacter               | 0.006698821 | 0.01497902 | 2.88385589 | 6.42490919 | 0.36262983 | 0.7575732  |
| Anaerovibrio                  | 0.011769538 | 0.00905917 | 0.00334504 | 0.00747974 | 0.14100078 | 0.78292539 |
| Cellulosilyticum              | 0           | 0          | 0.0220531  | 0.02633366 | 0.12001306 | 0.79133613 |
| Rickettsiales_fa_ge           | 0           | 0          | 0.00860324 | 0.00728312 | 0.04590031 | 0.69178323 |
| Treponema_2                   | 0.663707193 | 0.93452734 | 0          | 0          | 0.17313555 | 0.76107504 |
| WPS-2_ge                      | 0.060361654 | 0.0818895  | 0          | 0          | 0.16022083 | 0.7683317  |
| Bacteroides                   | 0.006700843 | 0.01110935 | 0.01066891 | 0.01267946 | 0.61032414 | 0.67778102 |
| Alloprevotella                | 0.031859226 | 0.05820261 | 0.04214533 | 0.08073989 | 0.82236357 | 0.86759356 |
| Ruminococcaceae_V9D2013_group | 0.001674705 | 0.00374475 | 0.01039956 | 0.01219295 | 0.177536   | 0.61409994 |
| Saccharimonadaceae_ge         | 0.010080253 | 0.01165622 | 0.0016852  | 0.00376823 | 0.17604243 | 0.61908254 |
| Fastidiosipila                | 0.023552091 | 0.03630382 | 0          | 0          | 0.20657661 | 0.61391077 |
| Rhodospirillales_fa_ge        | 0.006709164 | 0.00748967 | 0.00334504 | 0.00747974 | 0.49353091 | 0.58502821 |
| Atopobiaceae_ge               | 0.00505053  | 0.00505073 | 0          | 0          | 0.07559506 | 0.72502534 |
| Peptococcaceae_ge             | 0.010070534 | 0.01423468 | 0          | 0          | 0.17450775 | 0.75145174 |
| Lachnospiraceae_FCS020_group  | 0.39212006  | 0.58223454 | 0.00523911 | 0.00810302 | 0.19748218 | 0.63134455 |
| Psychrobacter                 | 0.02516873  | 0.04744899 | 0          | 0          | 0.28887043 | 0.6926325  |
| Erysipelotrichaceae_UCG-004   | 0           | 0          | 0.06136537 | 0.09604684 | 0.21247827 | 0.62267937 |
| GCA-900066225                 | 0.00336025  | 0.00475215 | 0.00514136 | 0.00514564 | 0.58224598 | 0.65002064 |
